# Supplementary material
Source: publisher figshare collection journal article supplement (https://karger.figshare.com/articles/dataset/_/24145485)
Supplement: Supplementary file 1 [file 1]

## Sheet: Sheet1
PTID	Wnt/β-catenin mutation	Protein Variant of CTNNB1	Cell cycle control	Chromatin modifiers	PI3K-Akt pathway	Oxidative and ER stress	DNA repair	Epigenetic regulator	inflamed_non-inflamed	age	sex(0:female,1:male)	etiology	tumor size	vascular invasion	diffrentation	recurrence	RFS	death	OS	PLT	NLR	CRP	FIB4_index	Albumin	total_bilirubin	ALBI score_pre	ALT	AFP	DCP	RNAseq	PTID	AXIN2	BCL11B	CCL4	CCL5	CD2	CD244	CD247	CD27	CD3D	CD3E	CD3G	CD6	CD69	CD7	CD8A	CD8B	CD96	CRTAM
1	WT		WT	ARID2	WT	KEAP1,CYP2C19	WT	KMT2D	non-inflamed	72	1	Others	3.5	0	M	1	38.7667	1	50.8	18.7	1.27034	0.331	2.11153	4.1	0.7	-2.77346	35	5	1773		1	17.658	0.052	1.463	1.724	0.575	0	0.209	0.052	0.104	0.522	0.261	0.104	0.313	0.157	0.679	0.104	0	0
2	WT		WT	WT	WT	WT	WT	WT	non-inflamed	67	0	NASH	13	0	M	0	93.9	0	93.9	23.9	1.76946	0.284	2.437	4.7	0.7	-3.28346	63	7	25		2	1.642	0.723	9.853	12.284	3.153	0.985	1.905	1.182	1.511	7.423	3.022	0.985	6.306	2.759	5.189	1.577	2.89	0.92
3	WT		WT	WT	WT	WT	WT	WT	non-inflamed	78	1	NASH	4	0	W	1	22.1333	1	85.6333	14.3	1.76636	0.116	4.43418	4	0.7	-2.68846	85	10	31		3	1.192	0.238	24.722	16.137	2.941	1.351	3.1	0	0.874	5.882	3.816	0.636	5.723	0.318	4.69	0.318	2.941	0.556
4	WT		WT	WT	WT	WT	WT	WT	non-inflamed	65	1	NASH	2.8	0	M	0	106.067	0	106.067	17.5	0.888172	0.124	2.43445	4.7	0.5	-3.3799	60	4	15		4	8.885	0.537	12.403	44.364	9.719	3.458	5.307	1.67	4.055	22.54	8.11	1.729	13.178	4.055	14.013	2.862	9.839	1.61
5	WT		WT	WT	WT	WT	WT	WT	non-inflamed	73	1	NASH	6.2	0	M	1	10.8667	1	88.1	19.1	3.71098	0.278	2.65874	4.9	0.5	-3.5499	43	3	199		5	17.33	0.671	98.731	13.913	2.685	1.464	3.234	0.427	2.014	5.431	2.502	1.709	28.069	5.492	5.614	1.037	3.844	1.77
6	CTNNB1	Thr41Ala	WT	SMARCA4	WT	WT	WT	WT	non-inflamed	64	1	NASH	13	0	M	1	28.4	0	101.3	19.4	1.36623	0.122	2.1352	4.2	1.1	-2.7289	55	2	641		6	22.799	0	51.397	12.232	0.919	0.057	1.723	0.115	0.632	3.905	0.689	0.172	22.684	0.574	4.709	0.115	0.517	0.345
7	CTNNB1	Thr41Ala	CREBBP	CREBBP	WT	WT	WT	WT	non-inflamed	65	1	NASH	4.5	0	M	1	9.73333	0	51	24	1.52101	0.387	1.36316	4	0.4	-2.84886	57	7	421		7	5.401	0.321	2.829	7.265	3.986	0.257	1.415	0.129	0.643	4.565	2.829	0.386	1.8	1.35	1.993	0.514	2.765	0.064
8	CTNNB1	Thr951Phe	CDKN2A	WT	WT	WT	WT	WT	inflamed(T-cell exhaustion)	69	1	NASH	7.6	0	M	0	60.7	0	60.7	27.9	2.97797	0.463	1.32841	3.5	0.4	-2.42386	30	2044	1414		8	0.259	3.433	49.099	139.912	38.67	4.599	10.753	5.959	23.578	65.94	34.395	6.089	76.693	8.55	87.639	21.311	30.12	8.097
9	WT		TP53	WT	WT	WT	WT	WT	non-inflamed	70	1	alcohol	6.5	1	M	1	3.63333	1	5.26667	16.3	2.04778	0.174	1.92273	4.9	0.5	-3.5499	22	65	2079		9	1.083	0.474	23.562	33.244	7.312	0.271	1.896	1.963	2.573	9.614	4.739	0.745	13.135	1.557	8.396	1.083	4.13	0.203
10	WT		ATR	WT	WT	WT	WT	TET1	non-inflamed	70	0	NASH	3.7	0	M	1	91.8333	0	97.5667	16.1	1.07778	0.11	2.70239	4.1	0.6	-2.81764	29	204	88		10	1.19	1.68	9.381	19.393	12.812	0.35	2.1	2.31	5.531	16.592	6.511	2.1	12.672	3.921	6.301	0.98	7.211	0.56
11	CTNNB1	Thr41Ala	WT	ARID2	TSC1	WT	WT	WT	non-inflamed	77	1	NASH	3.4	0	M	0	107.333	0	107.333	19.4	3.18807	0.053	1.68627	4.6	0.6	-3.24264	20	3	15		11	4.493	0.671	22.731	11.6	5.029	1.676	1.609	1.274	2.682	9.119	4.359	0.738	20.787	2.213	4.694	0.671	2.816	0.536
12	WT		TP53,CDKN2A,CDK12	WT	WT	WT	WT	WT	non-inflamed	78	1	Others	8.5	1	P	1	15.9	0	108.733	16.4	2.86147	3.431	5.7359	3.7	0.4	-2.59386	61	7	5439		12	1.915	0.479	30.527	43.185	8.137	0.425	1.649	1.436	3.989	14.519	8.137	1.383	6.329	2.659	18.667	1.436	6.169	1.223
13	WT		WT	WT	WT	WT	WT	WT	non-inflamed	84	0	NASH	10	1	M	1	13.2667	0	48.9667	20.7	1.85174	1.51	3.07286	3.8	1.1	-2.3889	14	39	78350		13	0.073	0.146	6.121	26.523	3.716	0.51	2.332	0.146	2.186	10.128	4.955	1.457	1.603	1.749	3.716	0.729	2.915	0.291
14	CTNNB1	Ser37Tyr	WT	ARID1A,ARID2	WT	NFE2L2	WT	WT	non-inflamed	61	1	NASH	15	1	M	1	0.966667	0	2.3	20.4	2.65182	0.579	3.46863	3.6	0.8	-2.31018	25	9	44716		14	22.713	0.785	125.4	22.657	2.075	0.617	3.421	0.168	0.673	5.496	1.626	0.28	12.843	2.187	1.963	0.112	1.682	0.28
15	WT		WT	WT	WT	KEAP1	WT	WT	non-inflamed	68	1	Others	3	1	M	1	10.7	1	71.9	8.6	4.65385	4.203	6.52456	3.1	0.6	-1.96764	23	4	32		15	8.168	0.696	3.482	3.103	0.886	1.33	0.38	0.127	0.19	1.393	0.57	0.127	1.963	0.38	1.013	0.253	0.443	0
16	WT		WT	WT	WT	WT	WT	WT	non-inflamed	67	0	NASH	3.1	0	M	1	29.3333	0	30.2333	14.8	1.74839	0.066	2.41441	3.1	0.2	-2.28254	9	3	25		16	0.842	1.474	27.166	33.625	10.389	0.983	4.422	1.123	4.563	23.025	8.985	2.668	15.654	6.177	8.353	1.685	6.318	0.702
17	WT		TP53,CCND2	WT	WT	ROS1,GOPC	WT	WT	non-inflamed	50	1	HBV	11.4	0	P	1	3.03333	0	6.53333	14	2.09184	1.016	5.27867	3.8	1	-2.41622	41	72570	42317		17	1.225	1.906	11.915	13.072	1.838	1.089	1.906	1.294	5.379	9.259	3.132	0.953	9.123	3.404	8.034	2.723	1.77	0.817
18	WT		WT	WT	WT	WT	WT	WT	inflamed(T-cell exhaustion)	73	1	Others	12	1	P	1	2.4	0	5.5	27.7	3.45087	11.592	3.64329	2.9	0.6	-1.79764	17	4	15		18	2.982	8.363	97.309	202.805	55.847	5.029	22.222	23.216	51.754	84.619	33.099	13.275	26.023	25.204	123.157	41.579	22.339	12.865
19	CTNNB1	Ser33Pro	ATM	ARID2	WT	WT	WT	WT	non-inflamed	78	1	Others	8	1	M	1	49.9667	0	75.8	19.4	1.88925	0.124	2.11753	3.8	0.7	-2.51846	100	4	66		19	54.605	0.499	8.799	4.306	0.749	0.312	2.059	0.187	0.25	2.871	1.061	0.312	4.493	0.686	4.181	0	0.562	0.187
20	WT		TP53,CREBBP	CREBBP	PTEN	WT	WT	WT	non-inflamed	66	1	Others	7	0	M	0	19.4	1	19.4	22.3	3.86364	1.769	8.82644	3.3	1.3	-1.91602	875	3	729		20	0.383	0.767	18.935	6.516	0.843	13.262	3.066	0.153	1.533	5.213	2.836	0.843	8.433	2.07	1.84	0.383	3.22	1.15
21	WT		TP53	KMT2A	PIK3CA,PIK3R1	WT	MLH1	KMT2A,KMT2C	inflamed(T-cell exhaustion)	72	1	Others	3	0	P	1	30.5667	1	39.6333	17.1	1.66667	0.124	1.90916	3.9	0.6	-2.64764	20	1522	44		21	1.135	4.042	24.821	315.293	92.475	3.688	32.692	14.892	29.856	108.005	70.916	8.652	46.45	43.968	187.999	27.657	42.692	13.545
22	WT		TP53	WT	WT	WT	WT	WT	non-inflamed	49	1	HBV	3	0	P	1	18.2333	1	22.6333	14.2	1.79062	0.043	1.62006	4.3	1	-2.84122	24	7865	141		22	0.618	4.793	5.875	14.068	12.522	0.541	9.817	3.247	7.111	33.857	18.165	3.015	10.435	12.136	8.58	1.391	4.87	0.928
23	WT		TP53,CCND1	WT	PTEN	WT	WT	WT	inflamed	59	0	HBV	5	0	M	1	1.86667	1	4.53333	9	2.77729	0.161	4.60317	3.4	0.7	-2.17846	37	21	40		23	7.671	4.066	61.735	125.873	30.96	2.403	18.761	4.991	21.256	61.828	48.242	8.41	69.129	13.77	69.221	9.427	26.062	4.251
24	WT		TP53,CREBBP	ARID1A,CREBBP	WT	WT	WT	KMT2C	non-inflamed	75	0	HBV	2.5	0	P	1	29.6333	0	94.6	13.2	7.08547	10.612	5.17267	2.2	10.1	-0.39337	42	4132	108		24	1.1	0.55	20.582	31.895	8.249	2.907	6.756	2.357	6.992	15.712	9.82	2.357	12.334	3.614	25.767	2.278	7.62	2.514
25	WT		WT	WT	WT	WT	WT	WT	non-inflamed	62	0	HBV	2.1	0	M	1	26.1333	0	154.3	9.6	3.41538	3.409	7.89221	3.1	0.8	-1.88518	84	3218	2541		25	16.75	1.085	9.52	34.163	8.435	2.229	6.326	1.506	5.242	18.919	10.604	1.145	7.049	4.157	16.027	2.109	7.411	1.386
26	WT		WT	WT	WT	WT	FANCA	WT	non-inflamed	64	0	HBV	10	0	M	1	8.03333	1	75.9	47.1	2.02932	7.445	1.36562	3.1	0.3	-2.16632	38	22	4541		26	2.089	0.087	3.395	28.376	5.745	1.045	5.31	0.261	1.741	7.399	5.136	1.045	10.968	3.569	6.615	0.957	4.962	0.435
27	WT		WT	WT	WT	WT	WT	WT	non-inflamed	67	1	HBV	6	1	P	1	3.83333	0	5.93333	39.2	1.5043	2.618	0.694534	3.6	0.5	-2.4449	33	83	27335		27	2.142	0.134	6.492	7.697	1.673	0.468	1.071	0.535	1.004	5.555	2.008	0.535	2.744	6.358	3.413	0.736	0.937	0.268
28	WT		TP53	WT	WT	WT	WT	WT	non-inflamed	64	0	HBV	1.7	0	M	1	27.9333	0	144.2	13.1	1.22535	0.056	3.59674	3.7	0.8	-2.39518	22	2	12		28	0.737	0.804	50.976	18.354	4.488	3.751	5.292	2.211	3.215	11.321	6.096	0.938	4.22	7.234	11.254	2.077	9.311	1.876
29	WT		WT	WT	PIK3R2	WT	WT	WT	non-inflamed	67	1	HCV	4	1	P	1	4	1	23.2667	23.4	2.37838	0.029	1.29511	3.9	1.1	-2.4739	29	361	1875		29	0.194	0.776	5.111	14.687	8.023	0.518	2.782	1.553	4.4	13.846	9.058	1.876	21.61	6.793	2.847	1.165	6.47	0.129
30	CTNNB1	Gly34Ser	WT	WT	WT	WT	ERCC2	WT	non-inflamed	64	0	HCV	4.5	0	M	1	38.4667	1	54.4333	8.3	0.610487	0.019	6.96861	3.3	0.6	-2.13764	30	19	183		30	19.09	0	2.097	19.531	0.883	2.097	0.552	0.331	1.103	1.655	0.883	0	0.662	1.103	2.648	0.331	0.662	0.11
31	WT		TP53	WT	MAP3K7	WT	WT	WT	non-inflamed	59	1	HCV	5	0	M	1	14.3	0	37.1667	14.4	1.21703	0.105	2.68673	4.1	0.7	-2.77346	43	18			31	0.143	1.786	23.212	22.855	10.285	0.786	7.571	0.5	7.214	13.213	7.999	2.5	22.498	4.071	6.642	0.786	6.142	1
32	WT		TP53,Rb1	WT	WT	ATF1	FANCA	KMT2D	non-inflamed	73	1	alcohol	2	0	W	1	14.5667	1	15.9667	20.3	2.27899	0.244	2.33487	4.3	0.5	-3.0399	39	72	1766		32	0.316	1.027	26.538	40.754	8.846	0.79	10.11	2.606	10.662	19.587	7.819	3.001	10.426	10.978	16.349	4.581	6.003	1.58
33	CTNNB1	Thr41Ala	WT	WT	WT	WT	WT	SETD2	inflamed(T-cell exhaustion)	59	1	alcohol	3	0	M	0	21.7	0	21.7	8.5	0.855556	0.073	4.25777	4.4	0.4	-3.18886	55	2	45		33	5.063	1.943	10.302	84.831	15.542	0.765	8.772	2.826	9.243	45.624	20.428	2.119	21.311	3.532	38.56	6.535	9.772	2.59
34	CTNNB1	Ile35Ser	WT	WT	WT	WT	WT	WT	non-inflamed	70	1	Others	8	0	M	1	16.6	0	19.9333	30	2.22182	0.258	1.37489	4.2	0.4	-3.01886	44	2	534		34	51.301	0.587	5.417	4.83	0.914	0.261	1.436	0.065	0.065	3.981	1.632	0.392	2.023	0.326	1.175	0.392	1.044	0.196
35	CTNNB1	Ser45Phe	CCND1	KMT2A	PDGFRA	WT	WT	KMT2A,KMT2C	non-inflamed	72	1	NASH	4	0	M	0	16.8333	1	16.8333	21	0.785141	0.613	2.47372	3.8	1.3	-2.34102	57	4	913		35	24.957	0.388	18.362	6.659	0.776	0.711	1.422	0.129	0.194	2.392	0.905	0.259	2.651	1.487	1.422	0.194	1.358	0.259
36	CTNNB1	His36Pro	WT	WT	PIK3CA,NF1	WT	WT	WT	non-inflamed	75	1	alcohol	15	1	M	1	5.76667	1	9.4	30.7	2.76695	0.368	5.12796	3.8	3.2	-2.08282	207	5	2827		36	24.023	0.132	12.571	2.172	0.461	0	0.329	0	0.132	0.461	0.066	0.132	0.987	0.197	0.263	0	0.263	0.066
37	WT		CCND2	WT	WT	WT	WT	WT	non-inflamed	67	0	Others	15	0	M	0	172.633	0	172.633	34	3.79255	1.998	1.23333	3.9	0.5	-2.6999	36	7	231		37	0.082	0.411	7.062	11.989	5.173	1.15	3.777	0.575	5.83	7.555	4.106	0.985	6.076	1.56	7.472	1.724	3.777	0.575
38	CTNNB1	Thr41Ile	WT	WT	WT	NFE2L2	ERCC2	WT	non-inflamed	73	0	Others	3	0	M	1	20.7667	0	145	13.5	0.891775	0.041	3.82361	4.2	0.7	-2.85846	32	5	27		38	1.202	0.601	16.492	25.106	3.272	2.671	7.345	0.601	3.272	11.885	4.674	0.2	11.284	4.54	7.345	1.335	4.407	0.534
39	CTNNB1	Asp32Val	ATM,ATR	ARID1A,KMT2A	WT	KEAP1	WT	KMT2A	non-inflamed	56	1	HCV	3	0	M	1	13.5	0	137.133	13.6	1.7508	0.114	3.93467	3.8	0.9	-2.44642	33	3	33		39	36.168	0.425	14.322	14.929	7.282	0.91	2.063	1.456	4.43	6.554	2.367	1.335	4.551	2.67	8.193	1.942	3.216	0.243
40	WT		WT	WT	WT	WT	WT	WT	inflamed(T-cell exhaustion)	63	1	HCV	2	0	W	1	91.8	1	156.8	13.5	0.653846	0.056	5.35846	4	0.7	-2.68846	84	18	81		40	5.635	1.667	12.46	40.951	12.222	2.381	10	1.111	6.904	21.586	13.73	3.174	16.269	3.016	28.094	7.936	10.238	2.46
41	CTNNB1	Ser37Cys	WT	WT	WT	WT	XRCC2	WT	non-inflamed	71	1	HCV	3	0	M	1	2.1	1	123.233	13.2	1.20867	0.021	3.06668	4.3	1.2	-2.78896	41	4	156		41	67.24	0.415	5.124	4.501	0.554	1.177	2.216	0.208	0.208	1.246	1.454	0.9	0.623	1.108	1.108	0.692	1.87	0
42	CTNNB1	Se33Phe	WT	WT	WT	WT	WT	WT	non-inflamed	76	1	HCV	3.5	0	M	0	57.8667	0	57.8667	15.8	1.61846	0.021	2.42193	4.5	0.5	-3.2099	54	4	171		42	91.126	0.627	7.714	11.791	2.07	1.003	2.948	1.066	1.317	6.021	2.07	0.502	2.697	1.944	5.205	1.003	1.254	0.376
43	WT		TP53	WT	WT	WT	WT	WT	non-inflamed	64	0	HBV	1.7	0	W	1	27.9333	0	144.2	13.1	1.22535	0.056	3.59674	3.7	0.8	-2.39518	22	2	12		43	0.737	0.804	50.976	18.354	4.488	3.751	5.292	2.211	3.215	11.321	6.096	0.938	4.22	7.234	11.254	2.077	9.311	1.876
44	CTNNB1	Ser33Phe	WT	ARID1A	WT	WT	WT	KMT2D	inflamed	76	1	alcohol	3.1	1	M	0	45.6667	0	45.6667	21.4	0.550847	0.196	2.52874	5.1	0.4	-3.78386	30	7986	42		44	26.736	2.629	18.722	28.211	11.028	65.077	8.271	0.898	4.296	28.724	14.105	2.949	17.824	5.322	10.707	0.769	9.361	1.026
45	WT		WT	WT	WT	WT	WT	WT	non-inflamed	71	1	HCV	1.7	0	M	0	107.767	0	107.767	24.4	3.70056	0.973	2.11496	2.9	0.2	-2.11254	35	2	13		45	1.158	1.158	34.902	37.218	5.946	3.011	6.1	2.239	2.78	15.829	6.255	1.313	1.93	7.104	7.258	1.853	7.722	1.544
46	WT		TP53	WT	WT	WT	WT	WT	non-inflamed	70	1	HCV	3	0	M	0	50.3667	0	50.37	24.2	1.9244	0.008	1.74428	4.3	0.9	-2.87142	11	2	75		46	2.02	1.01	19.392	19.19	4.646	1.683	2.761	1.751	4.713	13.803	6.262	2.155	11.245	3.771	8.484	1.481	4.579	1.347
47	WT		WT	WT	WT	WT	WT	WT	non-inflamed	68	1	NASH	14	1	M	0	20.1	0	20.1	30.6	1.36649	0.365	1.33333	4.2	0.5	-2.9549	25	159	4248		47	1.526	1.664	84.049	39.25	6.241	0.485	4.577	1.387	7.559	15.395	5.548	1.803	8.876	3.745	9.917	2.011	5.548	1.248
48	WT		WT	WT	WT	WT	WT	WT	non-inflamed	55	0	HBV	2	0	M	1	10.2667	0	117.3	5	1.96795	0.027	5.76095	4.4	0.7	-3.02846	21	4584	56		48	0.642	0.642	16.873	7.121	3.721	0.706	0.449	0.77	1.411	5.902	2.63	0.449	7.057	3.272	3.529	0.513	2.695	0.321
49	CTNNB1	Asp32Gly	WT	WT	WT	NFE2L2	WT	WT	non-inflamed	64	1	NASH	4.2	0	M	1	45.9333	1	110.433	5.3	1.19799	0.101	9.40308	4.4	0.9	-2.95642	59	11	17		49	22.362	0.244	2.114	1.22	0.651	0.081	0.894	0	0.244	1.057	0.407	0	1.87	0.407	0.407	0.081	0.407	0
50	CTNNB1	Thr41Cys	WT	WT	PIK3C2B	WT	WT	WT	inflamed(T-cell exhaustion)	76	1	alcohol	1.6	1	M	0	114.833	0	114.833	16.4	2.07581	0.037	2.47001	3.6	0.5	-2.4449	22	3	133		50	11.447	3.677	83.095	113.166	57.769	2.195	10.439	19.869	34.697	59.43	38.197	7.414	27.521	30.012	125.207	20.818	16.785	7.355
51	WT		WT	WT	WT	WT	WT	DNMT3A,TET1	non-inflamed	68	1	NASH	5.5	1	M	1	6.03333	1	25.7333	24.6	2.55078	1.477	1.44095	3.7	0.7	-2.43346	23	36666	2433		51	3.791	0	1.93	7.168	1.585	0.138	2.344	0.069	1.379	5.101	9.65	0.138	1.999	0.551	1.103	0.069	1.103	0
52	WT		WT	WT	PIK3CA	WT	WT	WT	non-inflamed	61	1	alcohol	2.5	1	M	1	14.5	0	114.6	18.4	0.804928	0.056	1.54812	4.2	0.9	-2.78642	31	4	584		52	1.664	4.387	15.733	35.399	23.751	1.74	11.573	5.824	21.86	28.667	13.615	4.614	20.725	7.261	11.724	4.614	12.632	1.286
53	WT		TP53	WT	WT	WT	WT	KMT2D	non-inflamed	72	0	NASH	7.7	1	P	0	51.7333	1	97.2667	20.4	1.5971	0.215	3.06791	4.2	1.7	-2.60413	43	81	9191		53	8.413	1.642	23.393	36.389	10.739	0.752	4.104	2.599	7.456	13.407	4.446	1.163	8.55	8.482	17.921	2.326	11.149	0.342
54	WT		CCND1	WT	WT	WT	WT	WT	non-inflamed	62	1	alcohol	2.3	0	M	0	6.6	1	56.7667	9	0.939732	0.188	5.28248	3.8	0.6	-2.56264	30	11	38		54	3.759	0.454	146.782	31.041	4.536	1.879	4.536	0.454	2.592	12.118	4.99	1.037	16.007	2.139	13.22	1.296	5.962	0.583
55	WT		WT	WT	WT	WT	WT	WT	non-inflamed	65	1	HBV	2	0	M	1	4.26667	0	114.8	4.1	3.12857	0.015	6.54944	4.3	0.9	-2.87142	15	535	22		55	1.904	1.41	3.455	3.525	2.82	0.212	2.186	0.282	1.41	1.622	0.776	0.141	1.34	21.294	1.199	0.282	1.269	0
56	WT		WT	WT	WT	WT	WT	WT	NA	72	1	NASH	5	1	P	0	107.5	0	114.6	24.1	1.76562	0.143	1.46613	4.3	1	-2.84122	48	4	6240		56	NA	NA	NA	NA	NA	NA	NA	NA	NA	NA	NA	NA	NA	NA	NA	NA	NA	NA
57	WT		TP53	WT	WT	WT	WT	WT	non-inflamed	76	1	HBV	2.5	0	M	0	125.233	0	125.233	7.8	7.19298	8.409	14.3877	3.6	0.9	-2.27642	194	164	13		57	0.855	2.679	14.481	10.49	6.841	0.57	6.442	2.394	5.872	14.652	5.017	3.25	6.442	10.604	8.723	2.679	10.376	1.14
58	WT		WT	WT	WT	WT	WT	WT	NA	59	1	HCV	3.6	0	M	0	5.66667	1	5.66667	36.6	0.819066	0.104	1.11134	4	0.4	-2.84886	54	42	95		58	NA	NA	NA	NA	NA	NA	NA	NA	NA	NA	NA	NA	NA	NA	NA	NA	NA	NA
59	WT		WT	WT	WT	WT	WT	IDH1	non-inflamed	72	1	HCV	4	1	M	1	38.1333	1	45.7	12.4	4.74074	1.471	3.31744	3.3	1.3	-1.91602	48	16055	42109		59	2.126	0.6	6.815	8.56	3.598	0.6	3.435	0.981	3.871	5.016	2.072	1.036	5.234	2.726	5.343	0.981	2.671	0.273
60	APC	p.S966R; p.S1085R; p.S1067R; p.S1035R; p.S1101R; p.S1098R; p.S1000R; p.S1144R; p.S1136R; p.S843R; p.S1025R; p.S1126R; p.S1108R	WT	WT	WT	WT	WT	WT	inflamed	56	0	HCV	3.6	0	M	0	0.4	0	1.833	18.4	1.76415	3.232	0.714435	3.4	0.8	-2.14018	96	4	198		60	5.57	4.264	26.891	60.134	9.051	8.615	11.835	2.785	13.228	22.8	7.484	2.176	20.103	11.4	14.011	4.612	13.663	2.35
61	WT		WT	WT	WT	WT	WT	WT	non-inflamed	65	1	Others	10	1	M	1	10	1	35.4	58.4	3.425	1.281	1.53048	4.1	0.7	-2.77346	131	14799			61	2.226	0.431	8.687	9.692	2.369	0.431	1.077	0.933	3.231	3.518	1.651	1.508	4.092	1.651	4.523	0.718	1.651	0.215
62	WT		WT	WT	WT	WT	WT	WT	non-inflamed	45	1	HBV	1	0	M	1	12.5333	0	220.833	24.5	2.66667	5.8	0.828832	2.7	0.8	-1.54518	83	55	35		62	1.139	2.035	21.813	23.766	9.197	0.977	7.813	2.116	11.557	13.755	5.779	4.07	18.638	6.43	3.581	0.407	7.813	0.895
63	WT		TP53	WT	PTEN	WT	WT	WT	non-inflamed	56	1	HBV	5	0	P	1	15.9	0	15.9	17	5.19205	0.03	1.80471	5.1	0.9	-3.55142	25	19	425		63	0.834	0.303	2.199	5.611	2.426	1.82	1.668	0.379	6.369	6.294	3.564	0.682	2.806	1.744	3.64	0.455	4.322	0
64	WT		WT	WT	WT	WT	WT	WT	NA	62	0	HBV	2.5	0	M	1	35.5	0	165.9	15.1	1.46552	0.302	3.74821	4.3	0.9	-2.87142	30	556	57		64	NA	NA	NA	NA	NA	NA	NA	NA	NA	NA	NA	NA	NA	NA	NA	NA	NA	NA
65	WT		WT	WT	WT	ROS1	WT	WT	non-inflamed	64	1	HBV	2.7	1	P	0	0.366667	1	0.366667	7	8.83333	3.803	14.4261	2.1	1.6	-0.836503	244	1910	713		65	3.211	5.838	20.082	32.809	14.244	1.343	10.625	4.495	16.988	33.568	9.282	8.64	12.026	10.742	22.242	4.378	17.572	1.576
66	WT		WT	WT	WT	WT	WT	WT	non-inflamed	63	1	HCV	2.5	0	M	0	131.667	0	131.667	4.6	1.15815	0.033	9.18596	3.1	0.8	-1.88518	69	11	13		66	0.771	1.798	21.748	47.777	5.394	3.339	12.073	2.055	10.189	13.357	7.535	2.141	10.275	9.932	15.326	3.425	8.049	0.942
67	WT		WT	WT	WT	WT	WT	WT	NA	74	1	HCV	2	0	M	1	8.7	0	90.6	8.6	1.1202	0.197	4.94015	4.3	0.5	-3.0399	45	562	390		67	NA	NA	NA	NA	NA	NA	NA	NA	NA	NA	NA	NA	NA	NA	NA	NA	NA	NA
68	WT		WT	WT	WT	WT	WT	WT	inflamed(T-cell exhaustion)	62	1	HCV	2	0	P	0	182.433	0	182.433	15.6	1.40533	0.075	1.51442	4.3	0.3	-3.18632	16	133	116		68	3.541	4.52	29.456	40.982	31.038	1.13	12.732	7.006	16.724	69.157	35.558	7.684	49.721	9.944	38.195	6.629	31.038	4.219
69	WT		WT	WT	WT	WT	WT	WT	non-inflamed	69	1	HCV	3	1	P	1	1.63333	1	2.9	18.2	1.33514	0.11	2.37171	3.8	0.8	-2.48018	26	7	4834		69	12.959	2.696	34.441	31.049	8.61	2.522	8.175	2.609	9.567	17.742	5.566	3.305	14.089	11.828	23.83	2.522	6.001	1.565
70	WT		TP53	WT	WT	WT	WT	WT	non-inflamed	63	1	HCV	2.5	0	P	1	2	0	4.86667	10	1.71667	0.03	3.91946	4.6	0.3	-3.44132	15	65	323		70	4.121	0.944	7.04	2.662	1.202	0.429	1.03	0.258	3.606	2.232	1.03	0.429	1.889	1.374	0.859	3.263	2.061	0.086
71	WT		WT	WT	WT	WT	WT	WT	inflamed(T-cell exhaustion)	73	1	HCV	2	1	P	1	9.23333	0	33.5333	16.2	2.05882	4.356	5.64773	3	2.6	-1.46234	69	4	14		71	3.876	20.172	72.143	220.041	45.188	2.29	42.458	47.391	101.652	157.499	43.691	17.177	337.108	36.644	97.424	24.048	51.707	6.43
72	WT		WT	WT	WT	WT	WT	WT	inflamed	79	0	HCV	2.5	1	M	0	0.5	1	0.5	6.9	0.902778	0.145	9.52032	3.1	0.5	-2.0199	28	18			72	1.561	17.399	62.457	104.615	26.842	2.602	28.998	18.291	44.166	91.901	23.719	17.994	58.516	27.957	40.969	10.335	33.905	6.023
73	WT		WT	WT	WT	WT	ERCC2	WT	non-inflamed	67	1	HCV	2.2	0	M	1	33.7	1	92.4	7.1	1.15482	0.008	9.19963	3.6	1.2	-2.19396	149	86	21		73	99.12	0.875	7.625	19.561	3.25	0.437	3.312	0.875	2.25	5.687	1.937	0.75	0.812	3.312	5	0.687	1.875	0.812
74	APC	p.R2449C; p.R2338C; p.R2414C; p.R2348C; p.R2457C; p.R2313C; p.R2411C; p.R2421C; p.R2398C; p.R2156C; p.R2279C; p.R2439C; p.R2380C	WT	ARID2	WT	WT	WT	WT	non-inflamed	63	1	HBV	7	0	M	1	49.0333	1	117.2	21.9	1.77885	0.339	6.76482	3.9	1.6	-2.3665	463	44001	5113		74	1.265	1.195	7.803	13.848	6.889	0.633	4.921	0.773	5.835	12.302	4.71	2.179	13.989	7.451	6.959	1.828	4.358	0.351
75	CTNNB1	p.S33C; p.S26C	WT	WT	WT	WT	WT	WT	non-inflamed	64	1	HBV	2.1	0	M	0	14.5333	0	14.5333	14.8	11.7714	8.218	3.20565	3.1	0.9	-1.85142	590	2	33		75	37.367	0.398	5.102	3.578	0.53	0.53	2.451	0.133	0.265	1.458	0.398	0	0.464	0.861	0.994	0.133	0.398	0
76	WT		WT	WT	WT	WT	WT	WT	inflamed(T-cell exhaustion)	57	1	HCV	2.5	0	M	1	22.8333	1	50.6333	7	4.02674	0.169	10.067	4.2	1.3	-2.68102	114	51	214		76	1.61	5.598	51.916	66.103	21.012	1.074	19.095	8.282	34.432	44.171	11.963	8.205	207.894	22.239	37.576	6.978	21.012	2.761
77	WT		TP53	WT	WT	WT	WT	WT	inflamed	69	1	HCV	5	0	M	1	9.93333	0	24.6667	8.2	11	0.1	17.8203	3.6	1.4	-2.14978	186	122	27		77	2.119	4.239	61.814	139.61	26.58	3.885	17.573	9.714	27.463	57.752	20.575	7.064	21.458	20.31	66.052	17.749	16.866	4.327
78	WT		TP53	WT	WT	WT	WT	WT	non-inflamed	75	0	HCV	4	0	M	1	8.8	1	12.4667	7.9	10.369	0.679	22.1923	2.7	0.9	-1.51142	168	97	118		78	3.205	0.712	15.386	10.827	2.351	1.211	5.485	0.214	3.419	6.411	2.778	1.282	3.419	5.271	2.992	1.71	3.49	0.641
79	WT		CREBBP	CREBBP	PTEN	WT	WT	WT	non-inflamed	59	1	HBV	7	1	M	1	5.8	1	20.8	11.6	2.24111	0.219	3.01905	4	0.3	-2.93132	51	474	31		79	1.436	1.975	7.121	9.634	5.266	0.539	5.086	1.676	4.548	9.574	4.308	1.436	1.915	7.061	5.146	0.598	4.368	0.299
80	WT		WT	WT	WT	WT	WT	WT	inflamed	70	0	Others	6	0	M	1	6.46667	1	58.2333	12.7	8.46465	4.35	12.8788	2.7	1	-1.48122	261	17120	2994		80	1.965	15.963	12.832	65.632	28.181	1.842	28.365	15.288	50.959	89.577	35.18	16.024	31.005	28.672	24.067	8.595	30.821	2.701
81	WT		TP53	ARID2	TSC2	WT	WT	WT	non-inflamed	72	1	HCV	3	0	M	1	13.6667	0	14.7333	4	1.3172	0.333	35.1596	2.8	3.1	-1.24192	101	4	981		81	1.921	1.769	12.386	42.316	11.375	1.011	6.825	1.264	3.741	19.667	14.207	1.517	5.561	6.522	24.065	2.882	8.241	0.607
82	WT		ATM	WT	WT	WT	WT	WT	non-inflamed	65	1	HBV	6	1	P	1	2.13333	1	13.9	22	2.19495	1.367	15.4571	3.8	0.8	-2.48018	40	3747	10891		82	114.274	0.792	9.015	29.117	3.777	0.609	3.168	0.914	2.741	9.624	4.569	0.548	16.569	2.619	14.437	1.157	4.995	0.365
83	CTNNB1	p.S45P; p.S38P	WT	ARID1A	WT	WT	WT	WT	non-inflamed	64	1	NASH	15	1	P	0	1.16667	0	182.233	30.3	6.44882	0.405	5.36408	3.9	0.4	-2.76386	497	4047	10538		83	10.676	1.509	3.354	13.359	3.466	0.279	1.453	0.894	0.335	7.043	4.025	0.335	3.074	6.764	14.813	0.391	0.783	0.056
84	WT		ATM	WT	WT	WT	WT	WT	non-inflamed	68	1	Others	12	1	P	0	0.0333333	1	0.0333333	11.6	8.94444	0.271	43.1985	3.5	2.5	-1.89858	3301	10146	323420		84	2.683	0.109	12.154	4.818	0.547	0.164	0.766	0.055	0.602	1.095	0.164	0.164	0.493	8.814	0.712	0.164	0.602	0.055
85	WT		WT	WT	WT	WT	WT	WT	NA	65	1	HCV	8	0	P	1	1.73333	1	3.2	12.9	6.8125	3.982	9.11415	2.7	1.1	-1.4539	177	6	1260		85	NA	NA	NA	NA	NA	NA	NA	NA	NA	NA	NA	NA	NA	NA	NA	NA	NA	NA
86	WT		WT	WT	WT	WT	WT	WT	non-inflamed	66	1	HCV	6	1	P	1	1.56667	1	3.03333	15.5	3.70391	5.3	3.12722	3.5	1.9	-1.97725	83	7293	241		86	2.734	4.825	9.89	8.363	3.779	0.322	2.654	0.885	27.34	7.398	11.177	1.206	7.076	389.267	4.825	6.996	3.699	0.402
87	WT		WT	WT	WT	WT	WT	WT	inflamed	75	0	HCV	3	0	M	1	11.4667	0	12.3333	12.9	1.48204	0.018	5.69742	3	0.7	-1.83846	48	491	274		87	6.811	4.302	32.889	34.054	15.235	3.943	11.023	6.094	13.98	28.409	14.697	5.287	48.035	6.273	22.046	5.287	32.71	2.868
88	WT		WT	WT	WT	WT	WT	WT	non-inflamed	66	0	HBV	3.5	0	M	0	1.83333	1	1.83333	7.1	9.18681	18.192	6.60297	2.5	4.5	-0.880102	76	26	17		88	3.37	3.37	4.493	17.762	7.231	0.983	4.774	1.615	5.546	13.058	5.055	3.23	12.778	3.23	7.021	1.896	63.958	0.211
89	WT		WT	WT	WT	WT	WT	KMT2D	inflamed(T-cell exhaustion)	78	0	HCV	2	0	M	1	17.3	1	101.533	12.4	2.48207	0.14	7.32952	4.4	0.3	-3.27132	15	613	17		89	0.702	27.52	173.548	419.504	150.306	10.599	68.896	49.996	121.318	216.967	110.016	34.799	28.031	124.063	332.219	81.666	72.216	16.282
90	WT		TP53	WT	WT	WT	WT	KMT2C	non-inflamed	65	1	HCV	5	0	M	1	4.63333	0	5.4	23.7	2.86463	0.948	1.58335	4.4	0.3	-3.27132	52	1671	71		90	3.108	3.174	5.157	4.562	8.067	0.066	2.248	0.727	15.605	9.059	8.464	2.182	5.62	4.893	1.984	0.132	5.554	0
91	WT		WT	WT	WT	WT	WT	WT	NA	65	0	Others	NA	NA	NA	0	61.8667	0	61.8667	42	3.50761	2.344	0.600925	3.4	0.4	-2.33886	13	4	13		91	NA	NA	NA	NA	NA	NA	NA	NA	NA	NA	NA	NA	NA	NA	NA	NA	NA	NA
92	CTNNB1	p.S37C; p.S30C	WT	WT	WT	WT	WT	WT	non-inflamed	55	1	HBV	2.5	0	M	0	138.4	0	138.4	5.8	3.5	12.485	7.37359	3.8	1.7	-2.26413	292	29	215		92	33.867	0.134	1.945	2.817	0.469	0.067	1.475	0.067	2.683	1.542	0.402	0.134	0.335	0.738	0.537	0.201	0.537	0
93	WT		WT	WT	WT	WT	WT	WT	inflamed(T-cell exhaustion)	72	1	HCV	1	1	P	1	5.16667	1	14.5	12.5	2.55814	0.287	7.38928	3.2	0.7	-2.00846	42	533	79		93	3.67	7.864	58.495	113.095	19.473	3.071	12.957	8.538	26.738	62.539	24.042	7.64	94.371	16.028	66.135	16.028	23.143	5.992
94	WT		TP53	WT	WT	WT	WT	WT	non-inflamed	46	1	HBV	12	1	M	1	29.1333	1	51.7667	12.2	6.94737	6.531	9.78309	3.3	4.6	-1.5538	1363	15280	46416		94	0.899	1.477	11.62	52.323	21.186	0.321	6.484	1.605	5.008	25.809	14.317	2.825	31.972	3.403	26.579	1.22	5.008	0.514
95	CTNNB1	p.S33Y; p.S26Y	ATM	WT	PIK3R1	WT	WT	WT	non-inflamed	76	1	HCV	10	0	M	0	16.8333	1	33.2667	19.9	1.75157	0.513	3.91389	3.7	0.6	-2.47764	39	3			95	75.208	0.261	3.196	12.98	0.978	0	1.826	0.457	0.522	2.479	1.5	0.457	0.913	0.783	1.761	0.326	0.913	0.652
96	WT		TP53	ARID2	WT	WT	ERCC5	WT	non-inflamed	60	0	HCV	4	0	M	0	2.93333	0	2.93333	6.2	4.34884	0.199	11.6905	2.9	1.2	-1.59896	58	27	298		96	2.203	2.134	37.864	38.415	11.979	1.928	10.327	2.616	12.667	22.374	8.743	2.754	19.827	6.196	12.185	3.098	15.421	2.065
97	CTNNB1	p.S45P; p.S38P	WT	KMT2A	WT	WT	WT	KMT2A	non-inflamed	70	1	Others	5.3	0	M	1	29.2667	0	190.4	18.6	3.73822	10.346	4.99877	3.1	1	-1.82122	190	2	131		97	15.622	0.395	7.449	14.106	3.032	2.109	4.878	0.857	2.439	8.965	5.01	1.912	4.219	1.186	6.46	1.121	3.098	0.198
98	WT		TP53	WT	WT	WT	WT	KMT2C	non-inflamed	64	1	HBV	5.5	0	M	1	20.7333	1	66.9333	21.5	1.13268	0.646	8.21774	2.8	2.5	-1.30358	729	10	1596		98	3.685	3.124	42.295	54.551	15.14	2.724	11.695	1.362	7.85	18.985	10.814	4.406	13.377	7.129	18.905	6.889	11.134	1.922
99	WT		WT	WT	WT	WT	WT	WT	NA	35	1	HBV	7	1	P	1	4.46667	1	5.53333	7	9.77108	0.32	4.72944	4	1.5	-2.47	17	5347	54992		99	NA	NA	NA	NA	NA	NA	NA	NA	NA	NA	NA	NA	NA	NA	NA	NA	NA	NA
100	CTNNB1	p.H29P; p.H36P	TP53	WT	WT	WT	WT	WT	non-inflamed	64	1	Others	5	1	M	1	28.9333	1	53	21.2	7.89474	10.885	2.05229	3.2	1.7	-1.75413	140	305	549		100	0.889	0.273	2.461	4.921	0.957	0.137	0.547	0.137	23.172	0.957	0.752	0.205	0.684	2.119	0.957	0.273	0.478	0.137
101	WT		WT	WT	WT	WT	WT	WT	non-inflamed	73	1	HCV	3	0	M	1	5.13333	1	13.1	25.3	2.91489	1.959	3.56412	2.8	0.5	-1.7649	33	162	866		101	1.797	2.156	7.907	10.782	2.156	1.438	3.235	3.594	8.625	4.313	1.797	2.156	2.516	7.547	2.516	1.797	6.11	1.438
102	APC	p.K1232R; p.K1222R; p.K1124R; p.K1268R; p.K1225R; p.K1159R; p.K1149R; p.K1090R; p.K1191R; p.K1260R; p.K1250R; p.K967R; p.K1209R	ATM	WT	PTEN	WT	WT	WT	non-inflamed	67	1	HCV	6	0	M	1	31.7	0	201.633	25.1	2.79386	1.2	1.06682	3.8	0.7	-2.51846	79	4	3556		102	0.418	0.07	8.428	15.951	4.04	0.488	2.438	0.348	1.045	6.13	4.179	0	16.16	1.602	6.13	0.906	5.155	0.139
103	CTNNB1	p.H29P; p.H36P	WT	WT	WT	WT	WT	WT	non-inflamed	69	1	Others	13	0	M	1	8.66667	1	102.7	21.9	2.251	2.659	1.57165	3.1	0.7	-1.92346	117	4	256		103	3.476	1.011	3.413	18.267	5.12	0.379	5.436	0.885	1.896	12.073	5.499	1.011	5.752	2.275	4.677	0.316	3.919	0.948
104	CTNNB1	p.S37C; p.S30C	WT	WT	WT	WT	WT	IDH1	non-inflamed	66	1	HCV	15	0	P	1	3.16667	0	3.66667	9.1	3.53125	9.723	11.2611	2.9	1.4	-1.55478	237	28576	3552		104	61.815	1.185	8.982	23.204	5.364	1.185	4.741	1.497	3.555	20.709	7.984	1.871	6.3	3.368	16.218	4.928	5.302	1.684
105	WT		WT	WT	WT	WT	WT	WT	non-inflamed	51	1	HBV	5	0	M	1	13.0667	0	79.4	29.4	1.6732	0.793	0.845835	3.7	0.3	-2.67632	89	111	24		105	10.973	3.072	18.434	16.679	6.584	3.511	3.511	5.706	2.633	6.145	2.633	2.633	9.217	5.267	9.656	0	9.656	1.756
106	WT		WT	WT	WT	WT	WT	WT	NA	78	0	Others	NA	NA	M		34.5	0	53.3333	23.6	3.65829	2.65	2.09322	4.3	0.5	-3.0399	9	4	18		106	NA	NA	NA	NA	NA	NA	NA	NA	NA	NA	NA	NA	NA	NA	NA	NA	NA	NA
107	WT		WT	WT	WT	WT	WT	WT	NA	60	1	Others	NA	NA	P	1	12.9667	0	17.0333	19.6	3.04902	2.408	1.28761	3.9	0.4	-2.76386	58	3	23		107	NA	NA	NA	NA	NA	NA	NA	NA	NA	NA	NA	NA	NA	NA	NA	NA	NA	NA
108	WT		WT	WT	WT	WT	WT	WT	NA	75	0	HCV	1	0	M	1	69.4667	1	72.6	12.7	1.81419	0.054	3.79321	3.9	0.6	-2.64764	35	9	23		108	NA	NA	NA	NA	NA	NA	NA	NA	NA	NA	NA	NA	NA	NA	NA	NA	NA	NA
109	WT		WT	ARID1A	WT	NFE2L2	WT	WT	non-inflamed	79	1	HBV	4.6	1	M	1	9.1	0	17.4333	11.7	15.25	22.516	21.5821	3.4	1.5	-1.96	325	2	27		109	31.698	0.049	11.025	7.826	2.067	0.394	2.313	0.738	1.526	4.43	2.215	0.492	1.723	2.264	4.085	0.689	1.083	0.148
110	APC		WT	WT	WT	NFE2L2	WT	WT	inflamed	77	1	HCV	4.8	1	M	0	115.467	0	115.467	27.5	2.9434	3.4	1.41838	3.5	0.6	-2.30764	101	2	19		110	2.813	1.14	6.462	36.11	17.637	2.053	11.859	1.901	9.807	38.011	20.146	2.661	14.824	3.497	19.918	5.626	9.959	0.836
111	WT		WT	WT	WT	WT	WT	WT	NA	65	1	HCV	2.5	0	M		8.56667	1	94.9333	5.1	2.01852	0.175	18.1413	2.8	1.1	-1.5389	86	40	44		111	NA	NA	NA	NA	NA	NA	NA	NA	NA	NA	NA	NA	NA	NA	NA	NA	NA	NA
112	WT		WT	WT	WT	WT	WT	WT	non-inflamed	73	0	HCV	4.7	0	M	1	9.3	1	80.4333	12.9	1.52661	0.052	5.36076	3.9	0.4	-2.76386	56	10	10		112	0.861	1.867	46.161	67.268	29.578	1.974	11.774	2.369	17.948	21.25	16.763	6.282	38.695	9.333	21.537	4.092	16.404	1.077
113	WT		WT	SMARCA4	WT	WT	WT	WT	non-inflamed	61	1	HBV	4	1	M	1	17.4	1	80.3333	14.9	5.23485	3.409	3.56178	3.4	1.5	-1.96	84	16	29		113	1.834	3.057	9.781	9.781	0.611	2.445	2.445	5.502	5.502	5.502	3.057	2.445	7.947	3.057	4.279	0	0	1.223
114	WT		WT	WT	WT	ROS1	MSH6	WT	non-inflamed	78	1	Others	4	0	M	0	21.9333	0	21.9333	17.8	2.01967	0.066	1.94612	3.9	0.7	-2.60346	12	1	305		114	0.731	0.146	9.208	14.032	1.827	0.95	2.704	0.219	3.216	4.75	2.85	0.146	1.023	1.023	5.335	1.096	1.462	0.512
115	WT		WT	WT	WT	WT	WT	IDH2	non-inflamed	61	1	Others	6	1	P	1	2.76667	0	11.3	9.4	10.1084	5.448	6.1713	3.3	1.4	-1.89478	366	357	25		115	9.415	2.296	7.119	11.367	7.233	0.919	2.813	0.631	2.583	11.826	7.635	0.287	7.922	15.672	7.693	1.378	4.65	0.919
116	WT		WT	EZH2	PIK3CA	WT	WT	WT	non-inflamed	75	1	Others	3.3	0	M	1	61.6	1	119.4	8.3	3.50754	2.692	28.9706	3.1	1.8	-1.65274	547	3	20		116	1.501	1.351	2.703	4.955	4.204	0	3.453	0.3	3.003	6.606	3.003	3.303	2.252	1.051	1.051	0	4.955	0.3
117	WT		WT	WT	WT	WT	WT	WT	NA	62	1	Others	2	0	M	0	11.1	0	11.1	26.2	1.1675	0.117	2.49283	4.3	1.4	-2.74478	7	7	305		117	NA	NA	NA	NA	NA	NA	NA	NA	NA	NA	NA	NA	NA	NA	NA	NA	NA	NA
118	WT		WT	WT	WT	WT	WT	WT	non-inflamed	72	1	HCV	10	1	P	1	1.96667	0	3.53333	6	5.92593	3.53	48.0025	3.6	3.3	-1.904	834	2137	1395		118	5.494	2.164	5.827	13.151	5.827	2.331	3.496	3.829	5.827	13.651	8.657	5.494	6.992	10.654	10.654	5.993	5.161	1.332
119	WT		WT	WT	WT	NFE2L2	MSH2	WT	non-inflamed	77	1	Others	5	1	P	1	16.5667	0	27	12.2	5.39583	17.7	4.92913	3.3	1.1	-1.9639	119	6	11677		119	0.378	2.017	22.5	54.958	15.063	4.034	6.933	8.76	9.58	37.752	20.735	4.475	15.441	8.004	24.328	5.672	10.903	3.592
120	WT		TP53	WT	WT	WT	MSH2	WT	inflamed(T-cell exhaustion)	59	1	HCV	4	1	P	1	1.2	1	21.6	23	2.33203	0.473	1.2595	4.1	0.4	-2.93386	29	266	166		120	2.61	2.436	60.258	36.074	21.459	3.132	8.177	8.409	9.917	43.149	22.039	3.48	11.657	18.385	62.23	9.743	9.511	2.436
121	WT		WT	WT	WT	WT	WT	WT	NA	81	1	HCV	2.5	0	W	0	44.8667	1	44.8667	9.4	1.14899	0.033	9.20252	3.4	1	-2.07622	137	32	22		121	NA	NA	NA	NA	NA	NA	NA	NA	NA	NA	NA	NA	NA	NA	NA	NA	NA	NA
122	WT		WT	WT	WT	WT	WT	WT	non-inflamed	74	0	HCV	3	0	M	0	0.233333	0	0.233333	9.5	2.27481	0.2	8.37886	3.9	1.3	-2.42602	69	42	346		122	0.959	2.078	36.439	18.539	6.553	4.795	5.274	2.557	7.512	20.777	8.47	2.717	16.941	7.192	10.548	2.877	6.712	1.438
123	WT		TP53	WT	WT	WT	WT	WT	non-inflamed	75	1	HCV	2	0	P	1	8.16667	1	83.5333	9.6	3.58824	0.086	9.69637	3.8	0.7	-2.51846	68	281	32		123	2.632	1.067	13.446	14.229	7.257	0.569	2.277	1.992	4.838	13.589	8.68	1.423	2.988	12.379	13.162	3.415	4.482	1.281
124	CTNNB1	p.S38Y; p.S45Y	WT	WT	WT	ROS1	WT	WT	non-inflamed	66	0	HCV	5.5	0	M	1	9.4	1	141.5	5	1.01099	0.108	10.7256	4.6	0.9	-3.12642	60	12	113		124	2.087	0.471	19.39	11.176	4.04	0.337	2.962	1.347	1.347	8.752	3.03	1.212	7.81	3.568	3.501	0.673	2.289	0.404
125	WT		WT	WT	WT	WT	WT	WT	inflamed(T-cell exhaustion)	79	1	Others	2	0	W	1	23.3667	0	45.0333	17.5	1.11111	0.165	2.46316	4.1	1.4	-2.57478	31	6	274		125	1.158	6.146	16.656	118.996	34.113	3.563	16.032	7.571	34.648	49.344	57.449	13.806	17.458	14.964	37.409	26.275	34.113	8.818
126	WT		TP53	WT	PTEN	WT	WT	KMT2D,SETD2	non-inflamed	74	0	HCV	4	1	M	1	36.7	0	49.6	14.7	1.68696	0.047	4.1374	3.9	0.5	-2.6999	46	79	131		126	0	0.479	7.032	7.192	2.877	1.199	0.959	0.799	1.838	5.035	2.477	0.4	2.717	0.959	2.557	0.799	2.078	0.08
127	APC	p.R572Q; p.R463Q; p.R495Q; p.R394Q; p.R554Q; p.R564Q; p.R453Q; p.R271Q; p.R536Q; p.R526Q; p.R513Q; p.R529Q; p.R428Q;p.R173*; p.R207*; p.R242*; p.R232*;p.R471*; p.R481*; p.R339*; p.R458*; p.R216*; p.R509*; p.R517*; p.R408*; p.R398*; p.R474*; p.R440*; p.R373*; p.R499*	WT	WT	WT	KEAP1	WT	WT	non-inflamed	75	1	HCV	4	0	M	1	11.0667	1	51.3667	15.8	3.54922	0.031	2.81467	3.8	0.6	-2.56264	54	3	13		127	38.805	0.771	14.99	9.806	4.833	0.981	1.611	0.63	2.522	7.075	3.782	1.261	13.799	2.312	4.833	0.49	2.452	0.14
128	CTNNB1	p.S37C; p.S30C	TP53	WT	WT	WT	WT	WT	non-inflamed	78	0	HCV	7	1	M	1	4.26667	1	4.93333	30	1.64024	0.24	2.24779	3.6	0.4	-2.50886	23	206	8890		128	75.692	1.118	2.049	3.664	0.745	0.435	0.869	0.497	0.745	1.739	1.056	0.186	0.31	1.242	0.497	0.186	0.931	0
129	WT		CCND1	EZH2	TSC1	WT	WT	DNMT3A	inflamed(T-cell exhaustion)	77	1	HCV	3	0	M		7.73333	0	18.03	20.5	1.39335	0.083	2.22144	4	0.8	-2.65018	23	35	51		129	0	5.315	32.898	82.657	29.324	2.108	9.53	14.754	19.885	50.584	38.121	5.407	21.352	109.049	101.351	21.168	11.821	8.797
130	WT		WT	WT	PIK3CA	WT	WT	WT	non-inflamed	77	1	HCV	3	0	M	0	17.5333	0	17.5333	18.6	1.4039	0.038	2.50185	4.3	0.8	-2.90518	27	4	81		130	0.575	0.072	17.672	9.913	4.095	0.216	1.149	0.79	2.658	7.902	4.454	0.934	6.106	2.658	4.813	0.934	2.083	0.287
131	CTNNB1	p.G27V; p.G34V	WT	WT	WT	WT	WT	TET2	non-inflamed	78	1	HCV	2.5	0	M	1	13.6333	1	50.5667	13.9	0.906318	0.209	6.7333	3.5	1.1	-2.1339	59	13	42		131	45.682	0.057	2.066	9.584	0.517	0.344	2.009	0.23	0.287	1.492	5.567	0.23	0.861	0.402	2.066	0.057	1.148	0.172
132	WT		WT	WT	WT	WT	WT	WT	non-inflamed	62	0	HCV	1.5	0	M	1	15.2	1	63.2667	9.7	0.862955	0.026	6.26646	3	1	-1.73622	44	11	31		132	0.338	3.316	17.526	63.674	11.571	4.263	8.391	4.737	16.105	26.728	11.909	3.925	18.135	7.714	22.127	5.887	12.451	3.316
133	WT		TP53	WT	WT	WT	WT	WT	non-inflamed	65	1	HCV	1.5	0	M	1	25.2	1	41.8333	14	2.44758	0.061	5.64808	3.8	0.6	-2.56264	102	436	306		133	0.287	1.222	16.743	16.887	7.545	2.228	4.886	1.868	4.312	17.533	9.988	3.234	12.36	6.324	7.833	2.084	4.958	0.503
134	WT		WT	SMARCA4	WT	WT	WT	WT	non-inflamed	74	0	Others	8	0	M	1	1.23333	1	28.6667	25.2	4.74843	0.311	1.59874	4	0.4	-2.84886	39	4	39		134	0.343	1.03	13.041	21.14	4.599	0.48	4.461	1.579	2.059	14.62	5.697	1.235	6.452	6.04	28.896	3.912	3.706	0.892
135	WT		WT	WT	WT	WT	WT	WT	non-inflamed	63	0	Others	3	0	W	1	3.6	1	9.06667	13.9	1.60133	0.054	2.7232	4.1	0.8	-2.73518	40	33	60		135	0.597	0.928	18.634	34.018	10.875	6.034	6.83	0.597	2.652	14.987	7.626	0.729	21.286	3.515	20.026	1.79	6.101	1.061
136	CTNNB1	p.S37C; p.S30C	WT	WT	WT	WT	WT	SETD2	non-inflamed	75	1	Others	2	1	M	0	2.66667	0	2.66667	16.2	0.527473	1.347	10.2374	2.1	0.9	-1.00142	84	6	26		136	23.454	0.995	2.986	14.744	3.297	0.747	1.929	0.249	1.182	7.341	2.115	0.373	2.488	1.68	1.369	0.809	1.493	0.435
137	WT		TP53,CCND1	WT	WT	WT	WT	WT	non-inflamed	78	1	HCV	6	0	M	0	3.06667	0	3.06667	11.4	3.20755	2.381	8.20436	3.6	1	-2.24622	24	2952	8581		137	0	0.796	2.081	4.04	3.061	0.245	1.286	0.796	5.265	9.55	6.428	0.673	5.938	3.183	2.449	0.367	3.306	0.49
138	WT		WT	WT	WT	WT	WT	WT	non-inflamed	66	0	HBV	5	0	M	1	31.5333	0	73.6667	13.7	1.96721	0.027	2.83438	4.1	0.9	-2.70142	26	19	137		138	4.386	3.254	91.682	21.435	9.55	4.245	6.65	2.052	5.093	16.483	7.145	1.91	24.689	13.229	12.663	1.698	6.862	1.132
139	WT		WT	WT	WT	WT	WT	WT	NA	67	0	Others	2	0	M	1	31.7	1	62.5667	13.3	1.3414	0.028	3.47669	3.8	0.5	-2.6149	25	387	3179		139	NA	NA	NA	NA	NA	NA	NA	NA	NA	NA	NA	NA	NA	NA	NA	NA	NA	NA
140	WT		WT	ARID1A	WT	WT	WT	SETD2	non-inflamed	79	1	Others	3	0	M	1	21.3	0	31.7667	22.5	1.92691	0.104	1.64224	4.4	0.4	-3.18886	12	4	1150		140	0.364	0.291	6.626	4.296	2.33	0.291	1.456	0.218	2.476	6.189	2.767	0.728	4.66	2.912	1.675	0.51	2.403	0.073
141	WT		AURKA	WT	WT	WT	WT	WT	non-inflamed	75	0	Others	4	0	M	1	8.63333	1	21.1333	29.7	1.17692	0.047	2.85471	3.9	0.5	-2.6999	11	8	2453		141	0.231	0.154	16.839	3.229	1.768	0.308	2.46	0.384	14.609	4.075	6.074	0.538	7.843	0.384	2.23	0.077	1.153	0.077
142	WT		WT	WT	WT	WT	WT	WT	inflamed	60	0	HBV	3	0	M	0	146.733	0	146.733	20.5	1.90096	0.137	1.93415	4.5	0.5	-3.2099	16	195	19		142	1.744	6.783	23.32	55.749	25	3.811	11.176	5.103	20.607	63.243	30.943	10.788	19.703	16.667	24.225	7.946	22.028	3.488
143	WT		TP53	WT	WT	WT	WT	WT	non-inflamed	65	1	HCV	7	1	M	1	10.2	1	17.9667	10.2	6.65254	9.318	9.36933	3.3	1.2	-1.93896	167	467	20		143	47.314	0.754	13.783	6.857	3.566	0.343	1.714	0.549	3.291	9.12	3.36	0.754	2.606	4.183	3.909	0.617	2.88	0.274
144	WT		TP53	WT	WT	WT	FANCA	WT	non-inflamed	73	0	HCV	3	0	M	1	53.2	0	109.033	20.3	1.54019	0.074	2.97639	4	0.5	-2.7849	24	444	664		144	20.864	0.623	5.169	5.73	3.363	2.18	1.308	0.498	1.121	6.353	2.055	0.436	1.308	0.934	1.557	0.374	3.363	0.436
145	WT		WT	WT	WT	WT	WT	WT	NA	52	1	HCV	2	0	M	1	6.7	1	57.9667	20.3	2.2397	0.418	1.58798	3.4	0.3	-2.42132	22	35	83		145	NA	NA	NA	NA	NA	NA	NA	NA	NA	NA	NA	NA	NA	NA	NA	NA	NA	NA
146	CTNNB1	p.S37C; p.S30C	WT	WT	WT	WT	WT	WT	non-inflamed	74	1	HCV	5	0	M	0	2.66667	0	2.66667	24.2	1.89542	0.14	1.9723	4	0.6	-2.73264	18	4	209		146	33.07	0.131	4.771	3.987	0.915	0.523	0.327	0	0.588	1.307	0.784	0.196	2.876	1.307	1.372	1.307	0.327	0
147	CTNNB1	p.S38F; p.S45F	TP53	KMT2A	WT	WT	WT	KMT2A	non-inflamed	79	1	HCV	2.5	0	M	1	12.4	1	17.5333	13.3	1.57015	0.047	5.51325	3.1	0.8	-1.88518	86	37	70		147	13.348	0.322	3.869	3.805	3.16	0.129	0.838	0	1.354	5.288	2.257	0.451	2.837	1.29	2.902	0.129	1.161	0.193
148	CTNNB1	p.S45P; p.S38P	TP53,ATR,CREBBP	CREBBP	WT	WT	WT	WT	non-inflamed	65	0	HCV	3	0	P	1	12.1333	1	48.9333	6.5	2.6129	0.04	11.4369	3.8	0.6	-2.56264	53	115	60		148	42.806	1.221	9.121	39.718	9.624	0.934	6.32	2.873	6.177	23.271	12.282	1.939	6.536	3.519	16.447	8.475	8.116	1.436
149	CTNNB1	p.N387K; p.N380K	WT	WT	WT	WT	WT	WT	inflamed(T-cell exhaustion)	71	1	HCV	3	0	M	1	1.46667	1	17.1	9.1	1.12788	0.081	6.9826	3.8	0.8	-2.48018	104	72	1615		149	2.588	2.275	41.886	109.107	20.708	4.157	6.903	6.824	15.139	44.631	32.63	5.177	10.432	13.57	57.652	12.629	14.511	5.804
150	WT		WT	WT	WT	WT	FGFR1	WT	inflamed(T-cell exhaustion)	74	1	HCV	3	0	M	1	24.0333	0	154.7	32.5	1.53258	0.128	1.11016	3.9	0.5	-2.6999	14	20	152		150	0.773	6.183	111.441	100.081	22.335	3.555	16.075	4.946	32.768	68.858	37.482	11.592	95.057	12.133	41.114	18.007	27.358	5.642
151	CTNNB1	p.G34D; p.G27D	WT	WT	WT	WT	WT	WT	non-inflamed	74	1	HCV	5	0	M	0	17.8	0	17.8	27.7	1.5226	0.395	1.1114	4	0.3	-2.93132	13	3	111		151	28.802	0	1.25	2.374	0.562	0.125	0.5	0	0.312	0.25	0.25	0.062	0.437	0.187	0.25	0.312	0.25	0
152	WT		WT	WT	WT	WT	WT	WT	NA	69	1	HCV	5	0	M	0	23.0333	0	23.0333	15.2	1.90196	0.034	2.99683	4.3	0.7	-2.94346	103	13	974		152	NA	NA	NA	NA	NA	NA	NA	NA	NA	NA	NA	NA	NA	NA	NA	NA	NA	NA
[truncated: 86 more columns]
